# Supplementary material
Source: PubMed Central journal article supplement (PMC7347209)
Supplement: NIHMS1590986-supplement-supplementary_material.pdf [file NIHMS1590986-supplement-supplementary_material.pdf]

# Supporting Information

## Cell Membrane-Specific Fluorescent Probe Featuring Dual and Aggregation-Induced Emissions

Yibin Zhang,<sup>a\*</sup> Yunnan Yan,<sup>a</sup> Shuai Xia,<sup>a</sup> Shulin Wan,<sup>a</sup> Tessa E. Steenwinkel,<sup>b</sup> Jerry Medford,<sup>a</sup> Emma Durocher,<sup>a</sup> Thomas Werner,<sup>b\*</sup> Rudy L. Luck,<sup>a\*</sup> and Haiying Liu<sup>a\*</sup>

<sup>a</sup>Department of Chemistry and <sup>b</sup>Department of Biological Sciences, Michigan Technological University, Houghton, MI 49931, USA. E-mail: rluck@mtu.edu; twerner@mtu.edu; hylu@mtu.edu

### Contents

|                                                                                                                                                                                                                                                                                                                   |       |
|-------------------------------------------------------------------------------------------------------------------------------------------------------------------------------------------------------------------------------------------------------------------------------------------------------------------|-------|
| <b>Table S1.</b> Summary of cell membrane-specific fluorescent probes                                                                                                                                                                                                                                             | 2-4   |
| Calculation of fluorescence quantum yield of the probe                                                                                                                                                                                                                                                            | 5     |
| Theoretical calculation on probe <b>A</b> .....                                                                                                                                                                                                                                                                   | 6-14  |
| <b>Figure S1.</b> GaussView representation of probe <b>A</b> .....                                                                                                                                                                                                                                                | 6     |
| <b>Table S2.</b> Computational results for probe <b>A</b> .....                                                                                                                                                                                                                                                   | 7     |
| <b>Table S3.</b> Calculated atomic coordinates for probe <b>A</b> in tetrahydrofuran.....                                                                                                                                                                                                                         | 8     |
| <b>Figure S2</b> Calculated IR spectrum for probe <b>A</b>                                                                                                                                                                                                                                                        | 9     |
| <b>Figure S3.</b> Calculated UV-Vis spectrum for probe <b>A</b> in tetrahydrofuran. ....                                                                                                                                                                                                                          | 9     |
| <b>Table S4.</b> Excitation energies and oscillator strengths listing for probe <b>A</b> in tetrahydrofuran. ....                                                                                                                                                                                                 | 10    |
| <b>Figure S4.</b> Drawings of selected molecular orbitals listed in Table S3. ....                                                                                                                                                                                                                                | 11    |
| <b>Table S5.</b> Calculated atomic coordinates for probe <b>A</b> in water.....                                                                                                                                                                                                                                   | 11-12 |
| <b>Figure S5.</b> Calculated UV-Vis spectrum for probe <b>A</b> in water. ....                                                                                                                                                                                                                                    | 13    |
| <b>Table S6.</b> Excitation energies and oscillator strengths listing for probe <b>A</b> in water. ....                                                                                                                                                                                                           | 14    |
| Instruments and materials .....                                                                                                                                                                                                                                                                                   | 15    |
| Synthesis of intermediates .....                                                                                                                                                                                                                                                                                  | 15    |
| <b>Figure S6.</b> <sup>1</sup> H NMR spectrum of compound <b>7</b> in CDCl <sub>3</sub> solution. ....                                                                                                                                                                                                            | 15    |
| <b>Figure S7.</b> <sup>1</sup> H NMR spectrum of compound <b>8</b> in CDCl <sub>3</sub> solution. ....                                                                                                                                                                                                            | 16    |
| <b>Figure S8.</b> <sup>1</sup> H NMR spectrum of probe <b>A</b> in CDCl <sub>3</sub> solution. ....                                                                                                                                                                                                               | 16    |
| <b>Figure S9.</b> <sup>13</sup> C NMR spectrum of probe <b>A</b> in CDCl <sub>3</sub> solution. ....                                                                                                                                                                                                              | 17    |
| <b>Figure S10.</b> Absorption and fluorescence spectra of probe <b>A</b> in the mixture solutions of THF and water with various water percentages. Concentration of probe <b>A</b> : 10 μM; excitation wavelength: 430 nm. ....                                                                                   | 17    |
| <b>Figure S11.</b> Fluorescence intensity of probe <b>A</b> (10 μM) in mixed water and acetonitrile solutions with various water percentages under excitation of 430 nm. ....                                                                                                                                     | 18    |
| <b>Figure S12.</b> Fluorescence intensities at 591 nm for probe <b>A</b> in mixed THF and water solution with 95% water under excitation at 488 nm versus time. Fluorescence intensities at 720 nm for CellBrite cell membrane NIR dye in the same solvent condition under excitation at 630 nm versus time. .... | 18    |

**Figure S13.** Fluorescence intensity of 5  $\mu\text{M}$  probe **A** at 595 nm in the presence of 200  $\mu\text{M}$  cations, such as  $\text{Mg}^{2+}$ ,  $\text{Ag}^+$ ,  $\text{Zn}^{2+}$ ,  $\text{Co}^{2+}$ ,  $\text{Al}^{3+}$ ,  $\text{Mg}^{2+}$ ,  $\text{Pb}^{2+}$ ,  $\text{Fe}^{2+}$ ,  $\text{Hg}^{2+}$ ,  $\text{K}^+$ ,  $\text{Cr}^{3+}$  and  $\text{Fe}^{3+}$  at 488 nm excitation.... 19

**Figure S14.** Fluorescence intensity of 5  $\mu\text{M}$  probe **A** at 595 nm in the presence of 200  $\mu\text{M}$  anions, such as  $\text{NO}_3^-$ ,  $\text{SO}_4^{2-}$ ,  $\text{SO}_3^{2-}$ ,  $\text{HCO}_3^-$ ,  $\text{PO}_4^{3-}$ , and  $\text{CO}_3^{2-}$  at 488 nm excitation: ..... 19

**Figure S15.** Fluorescence intensity of 5  $\mu\text{M}$  probe **A** at 595 nm in the presence of 200  $\mu\text{M}$  reactive oxygen, nitrogen and sulfur species, such as cysteine (Cys), homocysteine (Hcy), glutathione (GSH),  $\text{HSO}_3^-$ ,  $\text{S}_2\text{O}_3^{2-}$ ,  $\text{H}_2\text{S}$ ,  $\text{O}_2^-$ ,  $\text{H}_2\text{O}_2$ ,  $\text{ONOO}^-$ , and  $\text{ClO}^-$  at 488 nm excitation..... 20

**Figure S16.** Fluorescence intensity of 5  $\mu\text{M}$  probe at 595 nm in the presence of 200  $\mu\text{M}$  anions, cations, biothiols and reactive oxygen, nitrogen and sulfur species, such as  $\text{Mg}^{2+}$ ,  $\text{Ag}^+$ ,  $\text{Zn}^{2+}$ ,  $\text{Co}^{2+}$ ,  $\text{Al}^{3+}$ ,  $\text{Mg}^{2+}$ ,  $\text{Pb}^{2+}$ ,  $\text{Fe}^{2+}$ ,  $\text{Hg}^{2+}$ ,  $\text{K}^+$ ,  $\text{Cr}^{3+}$ ,  $\text{Fe}^{3+}$ ,  $\text{NO}_2^-$ ,  $\text{SO}_4^{2-}$ ,  $\text{SO}_3^{2-}$ ,  $\text{HCO}_3^-$ ,  $\text{PO}_4^{3-}$ ,  $\text{CO}_3^{2-}$ , Cys, GSH, Hcy,  $\text{HSO}_3^-$ ,  $\text{S}_2\text{O}_3^{2-}$ ,  $\text{H}_2\text{S}$ ,  $\text{O}_2^-$ ,  $\text{H}_2\text{O}_2$ ,  $\text{ONOO}^-$ , and  $\text{ClO}^-$  at 488 nm excitation..... 21

**Figure S17.** Fluorescence images of HeLa cells incubated with 10  $\mu\text{M}$  probe **A** for 15 minutes under excitation of 405 nm and 488 nm, respectively. Scale bars: 10  $\mu\text{M}$

## References

22

**Table S1. Summary of cell membrane-specific fluorescent probes**

| Probe                                                                               | Solvent       | $\lambda_{\text{ab}}$ (nm) | $\lambda_{\text{em}}$ (nm) | QY (%)           |
|-------------------------------------------------------------------------------------|---------------|----------------------------|----------------------------|------------------|
| 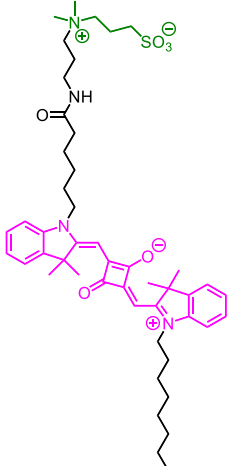  | pH 7.4 buffer | 628                        | 636                        | 2.2 <sup>1</sup> |
|  | pH 7.4 buffer | 626                        | 634                        | 1.4 <sup>1</sup> |

|                                                                                     |               |     |     |                    |
|-------------------------------------------------------------------------------------|---------------|-----|-----|--------------------|
| 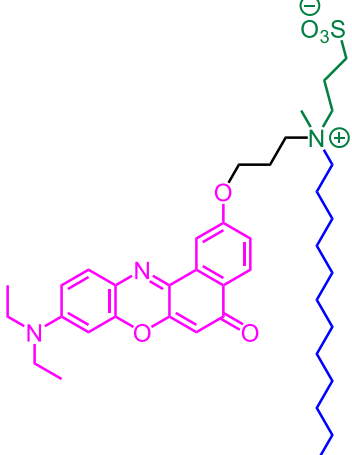   | pH 7.4 Buffer | 521 | 657 | 0.2 <sup>2-4</sup> |
|   | water         | 412 | 537 | <0.5 <sup>5</sup>  |
|  | water         | 594 | 615 | 1.0 <sup>6</sup>   |

|                                                                                                                         |                                              |     |             |                                                        |
|-------------------------------------------------------------------------------------------------------------------------|----------------------------------------------|-----|-------------|--------------------------------------------------------|
| 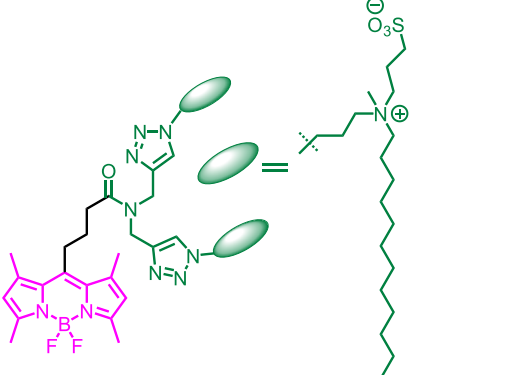                                       | pH 7.4 Buffer                                | 501 | 505         | 3.0 <sup>7</sup>                                       |
|                                        | water                                        | 330 | 460         | unknown <sup>8</sup>                                   |
|                                       | THF/DMSO                                     | 365 | 650         | 0.5 <sup>9</sup><br>water/DMSO<br>(99% water fraction) |
|  <p><b>Probe A</b><br/>This work</p> | THF/H <sub>2</sub> O<br>(90% water fraction) | 457 | 482 and 591 | 22.7 under 430 nm excitation                           |

### Calculation of fluorescence quantum yield of the probe

All absorbance spectra and emission spectra were obtained at room temperature using a standard 1 cm path length quartz fluorescence cuvette. The concentration of probes **A** or **B** was 5  $\mu\text{M}$  for each measurement and the solutions of the measurement were 10 % ethanol in different pH buffers. For the selectivity experiment, all metal ion solutions were freshly made, and the concentrations of all the metal ions in testing samples were controlled at 100  $\mu\text{M}$ . The slit widths of excitation and emission of fluorescence measurements were both set to 5 nm. The quantum yields were calculated according to the reference as reported.<sup>10</sup> Fluorescence quantum yields were calculated by measuring fluorescence of fluorophores of the known quantum yield with the same experimental parameters (excitation wavelength and slit width). The samples and the reference solutions were freshly prepared under identical conditions. The fluorescence quantum yields were calculated using the following equation:

$$\Phi_X = \Phi_{st} \left( \frac{Grad_X}{Grad_{st}} \right) \left( \frac{\eta^2_X}{\eta^2_{st}} \right)$$

Where the subscripts 'st' and 'X' stand for standard and test, respectively,  $\Phi$  is the fluorescence quantum yield, "Grad" represents the gradient from the plot of integrated fluorescence intensity versus absorbance, and  $\eta$  is the refractive index of the solvent. Rhodamine 6G with fluorescence quantum yield of 0.95 in  $\text{H}_2\text{O}$  was used as a standard reference<sup>11</sup> to calculate the quantum yield of the fluorescent probe.

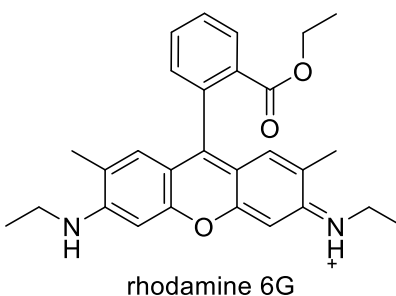

Fluorescent quantum yield of probe **A** is 22.7% in a mixed water and THF solution containing 95% water under excitation at 430 nm.

Theoretical calculation on probe A.

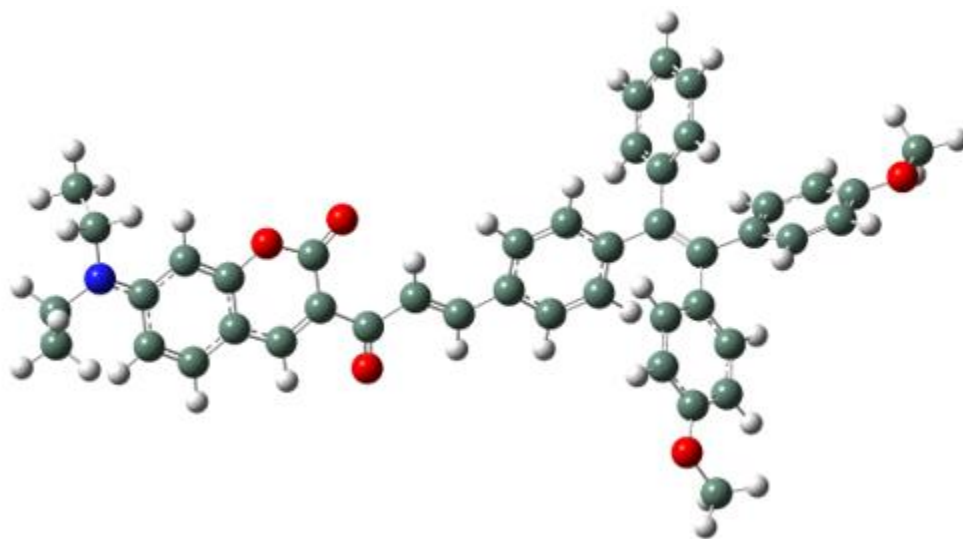

**Figure S1.** GaussView representation of probe A.

**Table S2.** Computational results for probe A.

| <b>mem (Optimization completed)</b>             |                                                 |              |
|-------------------------------------------------|-------------------------------------------------|--------------|
| <b>/home/rluck/calculation/liu/mem/mem2.log</b> |                                                 |              |
| <b>File Type</b>                                | .log                                            |              |
| <b>Calculation Type</b>                         | FREQ                                            |              |
| <b>Calculation Method</b>                       | RAPFD                                           |              |
| <b>Basis Set</b>                                | 6-311+G(d)                                      |              |
| <b>Charge</b>                                   | 0                                               |              |
| <b>Spin</b>                                     | Singlet                                         |              |
| <b>Solvation</b>                                | scrf=solvent=tetrahydrofuran                    |              |
| <b>E(RAPFD)</b>                                 | -2129.796108                                    | Hartree      |
| <b>RMS Gradient Norm</b>                        | 0.000003                                        | Hartree/Bohr |
| <b>Imaginary Freq</b>                           |                                                 |              |
| <b>Dipole Moment</b>                            | 7.155786                                        | Debye        |
| <b>Point Group</b>                              | C1                                              |              |
| <b>Job cpu time:</b>                            | <b>5 days 14 hours 30 minutes 15.1 seconds.</b> |              |

**Table S3.** Calculated atomic coordinates for probe **A** in tetrahydrofuran.

| Row | Symbol | X        | Y        | Z        | Row | Symbol | X        | Y        | Z        |
|-----|--------|----------|----------|----------|-----|--------|----------|----------|----------|
| 1   | C      | 9.637915 | 1.083696 | -0.33827 | 40  | O      | -3.92443 | 5.572479 | 1.031836 |
| 2   | C      | 9.729741 | -0.1597  | 0.362031 | 41  | O      | -10.6064 | -1.2522  | 0.720013 |
| 3   | C      | 8.548821 | -0.92384 | 0.506678 | 42  | N      | 10.90939 | -0.58833 | 0.871693 |
| 4   | C      | 7.363482 | -0.46234 | -0.02085 | 43  | C      | 12.16012 | 0.123383 | 0.644202 |
| 5   | C      | 7.264198 | 0.760399 | -0.71326 | 44  | C      | 12.42401 | 1.207681 | 1.681705 |
| 6   | C      | 8.445784 | 1.518545 | -0.85209 | 45  | C      | 11.00326 | -1.79629 | 1.679797 |
| 7   | O      | 6.266766 | -1.24378 | 0.139075 | 46  | C      | 11.19732 | -3.05632 | 0.844613 |
| 8   | C      | 5.00276  | -0.91447 | -0.34242 | 47  | O      | 4.146219 | -1.74959 | -0.15444 |
| 9   | C      | 4.878315 | 0.365671 | -1.02233 | 48  | O      | 3.625147 | 1.818189 | -2.36898 |
| 10  | C      | 6.003131 | 1.136145 | -1.20079 | 49  | C      | -11.2535 | -2.10741 | -0.20424 |
| 11  | C      | -0.17581 | 0.349252 | -1.17752 | 50  | C      | -4.6681  | 6.60867  | 0.417659 |
| 12  | C      | -1.28699 | 0.966462 | -1.77376 | 51  | H      | 10.51347 | 1.709142 | -0.45395 |
| 13  | C      | -2.57892 | 0.608397 | -1.42597 | 52  | H      | 8.543111 | -1.88422 | 1.004996 |
| 14  | C      | -2.81347 | -0.38602 | -0.46904 | 53  | H      | 8.398304 | 2.47062  | -1.37345 |
| 15  | C      | -1.70462 | -1.03022 | 0.102016 | 54  | H      | 5.892578 | 2.075673 | -1.73612 |
| 16  | C      | -0.41401 | -0.66358 | -0.23258 | 55  | H      | -1.12712 | 1.738166 | -2.52271 |
| 17  | C      | -5.06346 | -2.82227 | 1.075017 | 56  | H      | -3.4238  | 1.102662 | -1.895   |
| 18  | C      | -5.28053 | -4.19363 | 1.133697 | 57  | H      | -1.86861 | -1.82127 | 0.828265 |
| 19  | C      | -4.86617 | -5.01402 | 0.085525 | 58  | H      | 0.420078 | -1.17168 | 0.241953 |
| 20  | C      | -4.2207  | -4.45227 | -1.0141  | 59  | H      | -5.38939 | -2.18343 | 1.890405 |
| 21  | C      | -3.99607 | -3.08065 | -1.06601 | 60  | H      | -5.77063 | -4.6253  | 2.002304 |
| 22  | C      | -4.42998 | -2.24444 | -0.03131 | 61  | H      | -5.03745 | -6.08609 | 0.12982  |
| 23  | C      | -4.85774 | 1.561558 | 0.394425 | 62  | H      | -3.8889  | -5.08496 | -1.83301 |
| 24  | C      | -3.79957 | 1.968673 | 1.220206 | 63  | H      | -3.48618 | -2.64633 | -1.92189 |
| 25  | C      | -3.51643 | 3.307327 | 1.41622  | 64  | H      | -3.19259 | 1.21622  | 1.71451  |
| 26  | C      | -4.28758 | 4.289975 | 0.784701 | 65  | H      | -2.69998 | 3.617597 | 2.061568 |
| 27  | C      | -5.35882 | 3.90637  | -0.02712 | 66  | H      | -5.98062 | 4.643541 | -0.52241 |
| 28  | C      | -5.63715 | 2.55391  | -0.2014  | 67  | H      | -6.4758  | 2.26518  | -0.82911 |
| 29  | C      | -8.5344  | -1.43342 | -0.5563  | 68  | H      | -8.96821 | -2.07266 | -1.31689 |
| 30  | C      | -7.19449 | -1.07413 | -0.65448 | 69  | H      | -6.60793 | -1.44878 | -1.48779 |
| 31  | C      | -6.58491 | -0.24713 | 0.290127 | 70  | H      | -6.93088 | 0.901378 | 2.078782 |
| 32  | C      | -7.37595 | 0.240149 | 1.340416 | 71  | H      | -9.31136 | 0.24767  | 2.287181 |
| 33  | C      | -8.70654 | -0.11814 | 1.46264  | 72  | H      | 2.372563 | -0.45235 | -0.33103 |
| 34  | C      | -9.29772 | -0.96203 | 0.51576  | 73  | H      | 1.202502 | 1.552032 | -2.33231 |
| 35  | C      | 3.595955 | 0.887936 | -1.56345 | 74  | H      | 12.96063 | -0.6213  | 0.663015 |
| 36  | C      | 2.327493 | 0.325317 | -1.08136 | 75  | H      | 12.16724 | 0.532851 | -0.3685  |
| 37  | C      | 1.15521  | 0.778233 | -1.56684 | 76  | H      | 11.63997 | 1.969343 | 1.672584 |
| 38  | C      | -4.18718 | -0.7831  | -0.0943  | 77  | H      | 13.3801  | 1.701601 | 1.485672 |
| 39  | C      | -5.15978 | 0.130017 | 0.179406 | 78  | H      | 12.46545 | 0.784106 | 2.689258 |



| Row | Symbol | X        | Y        | Z        | Row | Symbol | X        | Y        | Z        |
|-----|--------|----------|----------|----------|-----|--------|----------|----------|----------|
| 79  | H      | 11.84576 | -1.66182 | 2.36367  | 85  | H      | -11.2635 | -1.67288 | -1.20905 |
| 80  | H      | 10.11852 | -1.87432 | 2.316562 | 86  | H      | -10.7765 | -3.09228 | -0.23575 |
| 81  | H      | 11.27187 | -3.93615 | 1.490083 | 87  | H      | -4.20869 | 7.54024  | 0.742675 |
| 82  | H      | 10.36433 | -3.21206 | 0.154276 | 88  | H      | -4.61696 | 6.541791 | -0.67385 |
| 83  | H      | 12.11464 | -2.99565 | 0.252045 | 89  | H      | -5.71497 | 6.5908   | 0.737424 |
| 84  | H      | -12.2765 | -2.21378 | 0.151511 |     |        |          |          |          |

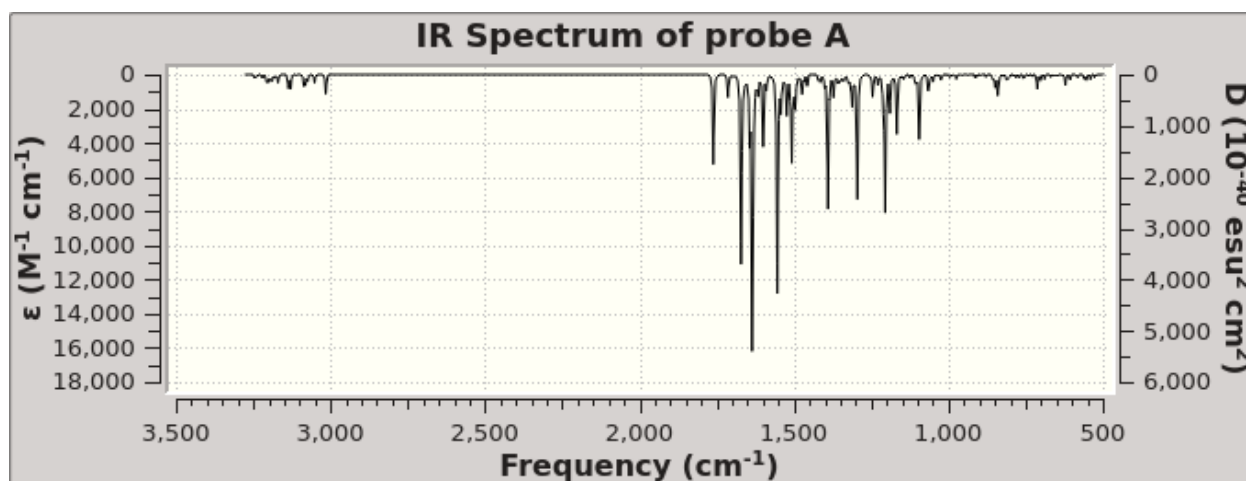

Figure S2. Calculated IR spectrum for probe A.

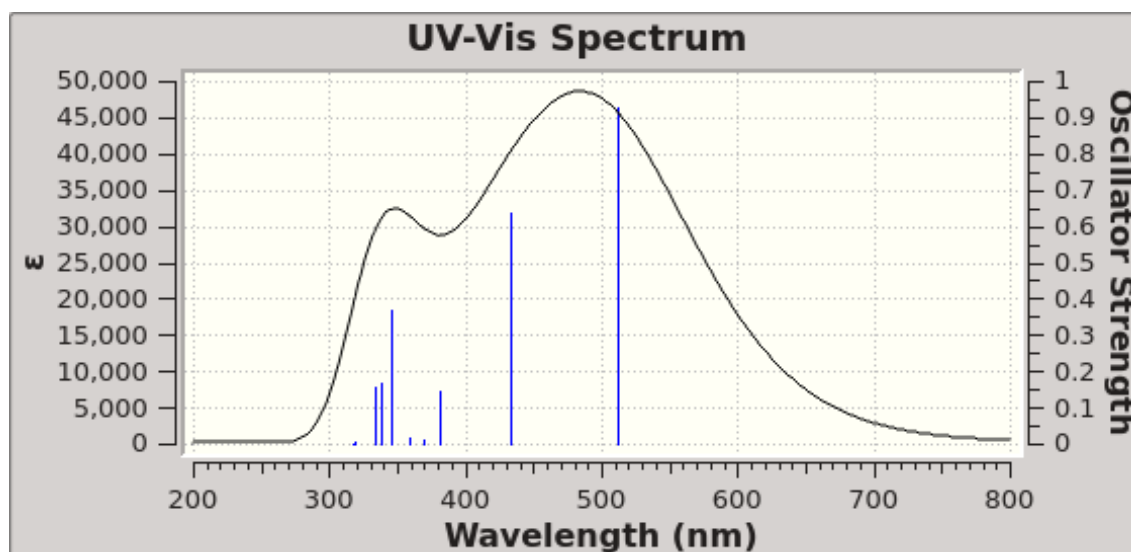

Figure S3. Calculated UV-Vis spectrum for probe A in tetrahydrofuran.

**Table S4.** Excitation energies and oscillator strengths listing for probe **A** in tetrahydrofuran.

| <b>Excited State</b> | <b>Nature</b> | <b>E (eV)</b> | <b><math>\lambda</math> (nm)</b> | <b><math>f</math></b> | <b>Orbital transitions</b>                                                       | <b>Normalized coefficient</b>                                   |
|----------------------|---------------|---------------|----------------------------------|-----------------------|----------------------------------------------------------------------------------|-----------------------------------------------------------------|
| 1:                   | A             | 2.4204        | 512.24                           | 0.9302                | 174 -> 176<br>175 -> 176                                                         | -0.10748<br>0.68973                                             |
| 2:                   | A             | 2.8589        | 433.68                           | 0.6367                | 174 -> 176<br>175 -> 176                                                         | 0.68774<br>0.11599                                              |
| 3:                   | A             | 3.2556        | 380.83                           | 0.1468                | 175 -> 177<br>175 -> 178                                                         | 0.68346<br>0.13196                                              |
| 4:                   | A             | 3.3521        | 369.87                           | 0.0126                | 167 -> 176                                                                       | 0.67770                                                         |
| 5:                   | A             | 3.4498        | 359.40                           | 0.0155                | 173 -> 176<br>173 -> 177                                                         | 0.69364<br>0.10867                                              |
| 6:                   | A             | 3.5852        | 345.82                           | 0.3701                | 172 -> 176<br>174 -> 177<br>175 -> 178                                           | 0.56836<br>-0.24306<br>-0.31289                                 |
| 7:                   | A             | 3.6737        | 337.50                           | 0.1680                | 174 -> 177<br>174 -> 178<br>175 -> 178                                           | 0.55866<br>-0.11353<br>-0.39479                                 |
| 8:                   | A             | 3.7174        | 333.52                           | 0.1581                | 172 -> 176<br>174 -> 177<br>175 -> 177<br>175 -> 178                             | 0.39362<br>0.31157<br>-0.10926<br>0.46157                       |
| 9:                   | A             | 3.8835        | 319.26                           | 0.0029                | 169 -> 176<br>169 -> 177                                                         | 0.68039<br>-0.12875                                             |
| 10:                  | A             | 3.9163        | 316.58                           | 0.0024                | 165 -> 176<br>166 -> 176<br>168 -> 176<br>170 -> 176<br>171 -> 176<br>175 -> 179 | 0.12347<br>0.11069<br>-0.12941<br>0.20947<br>0.26772<br>0.55456 |

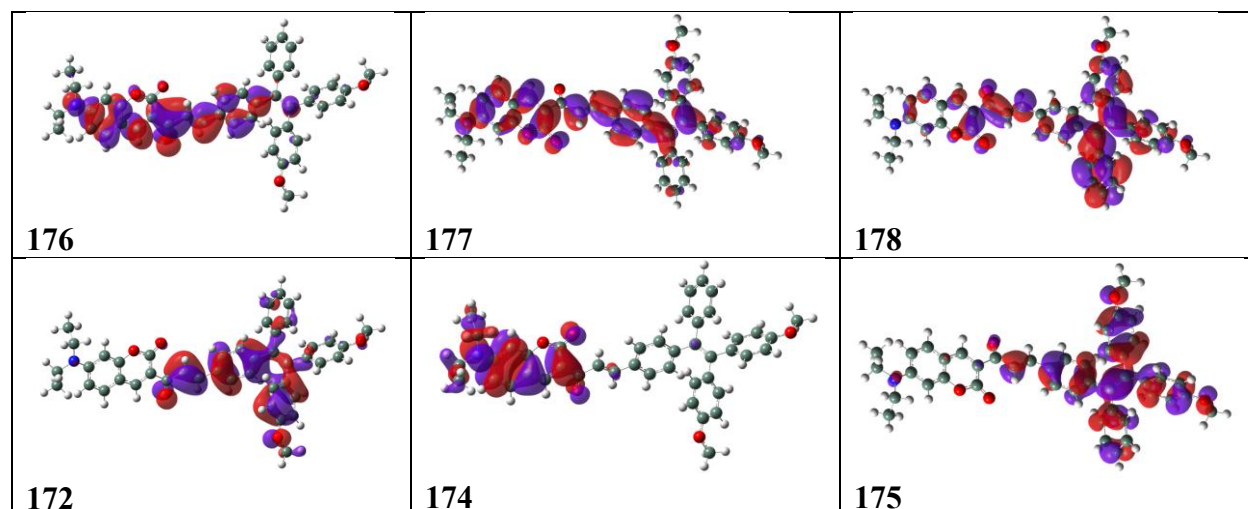

**Figure S4.** Drawings of selected molecular orbitals listed in Table S3.

**Table S5.** Calculated atomic coordinates for probe **A** in water.

| Row | Symbo | I        | X        | Y        | Z  | Row | Symbo    | I        | X        | Y | Z |
|-----|-------|----------|----------|----------|----|-----|----------|----------|----------|---|---|
| 1   | C     | 9.637915 | 1.083696 | -0.33827 | 19 | C   | -4.86617 | -5.01402 | 0.085525 |   |   |
| 2   | C     | 9.729742 | -0.1597  | 0.362031 | 20 | C   | -4.2207  | -4.45227 | -1.0141  |   |   |
| 3   | C     | 8.548822 | -0.92384 | 0.506678 | 21 | C   | -3.99607 | -3.08065 | -1.06601 |   |   |
| 4   | C     | 7.363482 | -0.46234 | -0.02085 | 22 | C   | -4.42998 | -2.24444 | -0.03131 |   |   |
| 5   | C     | 7.264199 | 0.760399 | -0.71326 | 23 | C   | -4.85774 | 1.561559 | 0.394425 |   |   |
| 6   | C     | 8.445784 | 1.518545 | -0.85209 | 24 | C   | -3.79957 | 1.968674 | 1.220206 |   |   |
| 7   | O     | 6.266767 | -1.24378 | 0.139075 | 25 | C   | -3.51643 | 3.307327 | 1.41622  |   |   |
| 8   | C     | 5.00276  | -0.91447 | -0.34242 | 26 | C   | -4.28758 | 4.289975 | 0.784701 |   |   |
| 9   | C     | 4.878315 | 0.365671 | -1.02233 | 27 | C   | -5.35882 | 3.906371 | -0.02712 |   |   |
| 10  | C     | 6.003131 | 1.136145 | -1.20079 | 28 | C   | -5.63715 | 2.55391  | -0.2014  |   |   |
| 11  | C     | -0.17581 | 0.349252 | -1.17752 | 29 | C   | -8.5344  | -1.43342 | -0.5563  |   |   |
| 12  | C     | -1.28699 | 0.966462 | -1.77376 | 30 | C   | -7.19449 | -1.07413 | -0.65448 |   |   |
| 13  | C     | -2.57892 | 0.608397 | -1.42597 | 31 | C   | -6.58491 | -0.24713 | 0.290127 |   |   |
| 14  | C     | -2.81347 | -0.38602 | -0.46904 | 32 | C   | -7.37595 | 0.240149 | 1.340416 |   |   |
| 15  | C     | -1.70462 | -1.03021 | 0.102016 | 33 | C   | -8.70654 | -0.11814 | 1.46264  |   |   |
| 16  | C     | -0.41401 | -0.66358 | -0.23258 | 34 | C   | -9.29772 | -0.96203 | 0.51576  |   |   |
| 17  | C     | -5.06346 | -2.82227 | 1.075017 | 35 | C   | 3.595955 | 0.887936 | -1.56345 |   |   |
| 18  | C     | -5.28053 | -4.19363 | 1.133698 | 36 | C   | 2.327493 | 0.325318 | -1.08135 |   |   |

| Row | Symbo | I        | X        | Y        | Z  | Row | Symbo    | I        | X        | Y | Z |
|-----|-------|----------|----------|----------|----|-----|----------|----------|----------|---|---|
| 37  | C     | 1.15521  | 0.778233 | -1.56684 | 64 | H   | -3.19259 | 1.21622  | 1.71451  |   |   |
| 38  | C     | -4.18718 | -0.7831  | -0.0943  | 65 | H   | -2.69998 | 3.617597 | 2.061568 |   |   |
| 39  | C     | -5.15978 | 0.130017 | 0.179406 | 66 | H   | -5.98062 | 4.643541 | -0.52241 |   |   |
| 40  | O     | -3.92443 | 5.57248  | 1.031836 | 67 | H   | -6.4758  | 2.26518  | -0.82911 |   |   |
| 41  | O     | -10.6064 | -1.2522  | 0.720013 | 68 | H   | -8.96821 | -2.07266 | -1.31689 |   |   |
| 42  | N     | 10.90939 | -0.58833 | 0.871693 | 69 | H   | -6.60793 | -1.44878 | -1.48779 |   |   |
| 43  | C     | 12.16012 | 0.123383 | 0.644202 | 70 | H   | -6.93088 | 0.901378 | 2.078782 |   |   |
| 44  | C     | 12.42401 | 1.207682 | 1.681706 | 71 | H   | -9.31136 | 0.24767  | 2.287182 |   |   |
| 45  | C     | 11.00326 | -1.79629 | 1.679797 | 72 | H   | 2.372563 | -0.45235 | -0.33103 |   |   |
| 46  | C     | 11.19732 | -3.05632 | 0.844614 | 73 | H   | 1.202502 | 1.552032 | -2.33231 |   |   |
| 47  | O     | 4.146219 | -1.74959 | -0.15444 | 74 | H   | 12.96063 | -0.6213  | 0.663015 |   |   |
| 48  | O     | 3.625148 | 1.81819  | -2.36898 | 75 | H   | 12.16724 | 0.532851 | -0.3685  |   |   |
| 49  | C     | -11.2535 | -2.10741 | -0.20424 | 76 | H   | 11.63997 | 1.969343 | 1.672584 |   |   |
| 50  | C     | -4.6681  | 6.608671 | 0.417659 | 77 | H   | 13.3801  | 1.701601 | 1.485672 |   |   |
| 51  | H     | 10.51347 | 1.709142 | -0.45395 | 78 | H   | 12.46545 | 0.784106 | 2.689259 |   |   |
| 52  | H     | 8.543112 | -1.88422 | 1.004997 | 79 | H   | 11.84576 | -1.66182 | 2.36367  |   |   |
| 53  | H     | 8.398305 | 2.47062  | -1.37345 | 80 | H   | 10.11852 | -1.87432 | 2.316563 |   |   |
| 54  | H     | 5.892579 | 2.075673 | -1.73611 | 81 | H   | 11.27187 | -3.93615 | 1.490083 |   |   |
| 55  | H     | -1.12712 | 1.738166 | -2.52271 | 82 | H   | 10.36433 | -3.21206 | 0.154276 |   |   |
| 56  | H     | -3.4238  | 1.102662 | -1.895   | 83 | H   | 12.11464 | -2.99565 | 0.252045 |   |   |
| 57  | H     | -1.86861 | -1.82127 | 0.828265 | 84 | H   | -12.2765 | -2.21378 | 0.151511 |   |   |
| 58  | H     | 0.420078 | -1.17168 | 0.241953 | 85 | H   | -11.2635 | -1.67288 | -1.20905 |   |   |
| 59  | H     | -5.38939 | -2.18343 | 1.890405 | 86 | H   | -10.7765 | -3.09228 | -0.23575 |   |   |
| 60  | H     | -5.77063 | -4.6253  | 2.002304 | 87 | H   | -4.20869 | 7.540241 | 0.742675 |   |   |
| 61  | H     | -5.03745 | -6.08609 | 0.12982  | 88 | H   | -4.61696 | 6.541792 | -0.67385 |   |   |
| 62  | H     | -3.8889  | -5.08496 | -1.83301 | 89 | H   | -5.71497 | 6.590801 | 0.737424 |   |   |
| 63  | H     | -3.48618 | -2.64633 | -1.92189 |    |     |          |          |          |   |   |

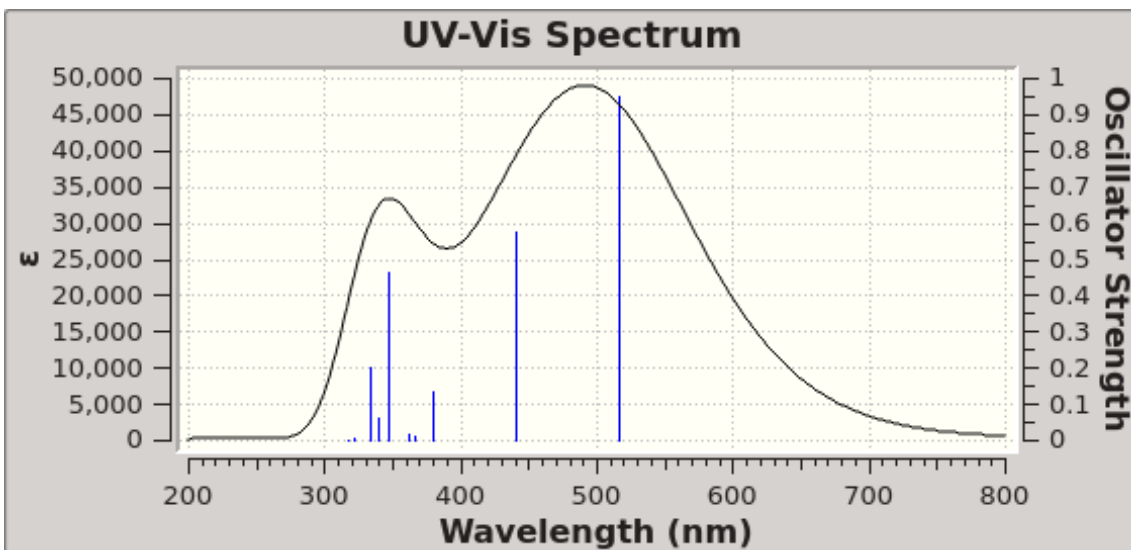

**Figure S5.** Calculated UV-Vis spectrum for probe A in water.

**Table S6.** Excitation energies and oscillator strengths listing for probe **A** in water.

| <b>Excited State</b> | <b>Nature</b> | <b>E (eV)</b> | <b><math>\lambda</math> (nm)</b> | <b><math>f</math></b> | <b>Orbital transitions</b>                                                       | <b>Normalized coefficient</b>                                   |
|----------------------|---------------|---------------|----------------------------------|-----------------------|----------------------------------------------------------------------------------|-----------------------------------------------------------------|
| 1:                   | A             | 2.40391       | 515.76                           | 0.9474                | 174 -> 176<br>175 -> 176                                                         | -0.10633<br>0.69044                                             |
| 2:                   | A             | 2.8186        | 439.87                           | 0.5774                | 174 -> 176<br>175 -> 176                                                         | 0.68943<br>0.11337                                              |
| 3:                   | A             | 3.2635        | 379.91                           | 0.1333                | 175 -> 177<br>175 -> 178                                                         | 0.68382<br>0.13178                                              |
| 4:                   | A             | 3.3897        | 365.77                           | 0.0111                | 167 -> 176                                                                       | 0.67897                                                         |
| 5:                   | A             | 3.4220        | 362.32                           | 0.0162                | 173 -> 176<br>173 -> 177                                                         | 0.69372<br>0.10447                                              |
| 6:                   | A             | 3.5762        | 346.69                           | 0.4654                | 172 -> 176<br>174 -> 177<br>175 -> 178                                           | 0.46998<br>-0.43870<br>-0.25404                                 |
| 7:                   | A             | 3.6478        | 339.88                           | 0.0640                | 172 -> 176<br>174 -> 177<br>174 -> 178<br>175 -> 178                             | 0.23794<br>0.48947<br>-0.10860<br>-0.41533                      |
| 8:                   | A             | 3.7193        | 333.35                           | 0.2030                | 172 -> 176<br>174 -> 177<br>175 -> 177<br>175 -> 178                             | 0.44788<br>0.19053<br>-0.10867<br>0.47858                       |
| 9:                   | A             | 3.8458        | 322.39                           | 0.0029                | 169 -> 176<br>169 -> 177                                                         | 0.68315<br>-0.13039                                             |
| 10:                  | A             | 3.9132        | 316.83                           | 0.0018                | 165 -> 176<br>166 -> 176<br>168 -> 176<br>170 -> 176<br>171 -> 176<br>175 -> 179 | 0.13700<br>0.11616<br>-0.12287<br>0.23998<br>0.27266<br>0.53706 |

## Instruments and materials

Unless specifically indicated, all reagents and solvents were obtained from commercial suppliers and used without further purification. Compounds **1** and **6** were prepared according to the reported procedures.<sup>12-13</sup> <sup>1</sup>H NMR and <sup>13</sup>C NMR spectra were performed with a Varian Unity Inova NMR spectrophotometer at 400 MHz and 100 MHz, respectively. Standard chemical shifts ( $\delta$ ) of intermediates and probes **A** and **B** were determined by using internal standards in ppm from solvent residual peaks (<sup>1</sup>H:  $\delta$  7.26 for CDCl<sub>3</sub>, <sup>13</sup>C:  $\delta$  77.3 for CDCl<sub>3</sub>). High-resolution mass spectrometer data (HRMS) were obtained by using a double focusing magnetic mass spectrometer and a fast atom bombardment (FAB) ionization mass spectrometer. Absorption and fluorescence spectra were collected by using a Cary 60 UV-Vis spectrometer and Jobin Yvon Fluoromax-4 spectrofluorometer, respectively.

## Synthesis of intermediates

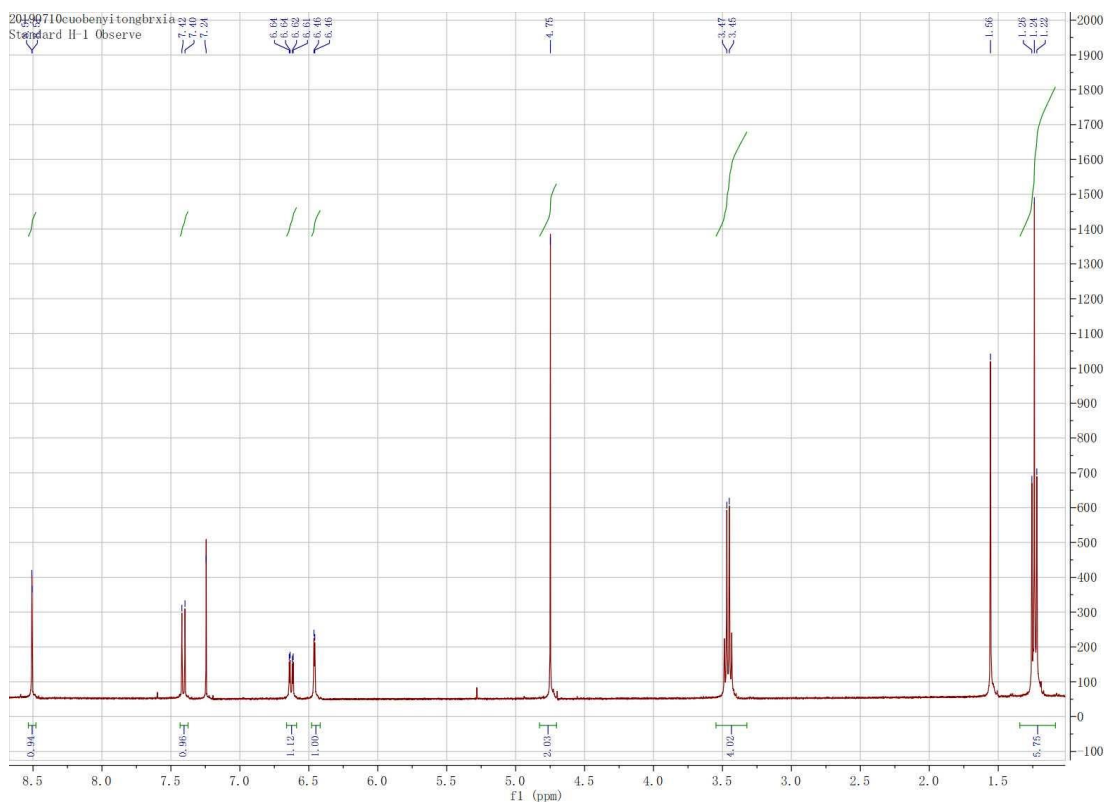

**Figure S6.** <sup>1</sup>H NMR spectrum of compound **7** in CDCl<sub>3</sub> solution.

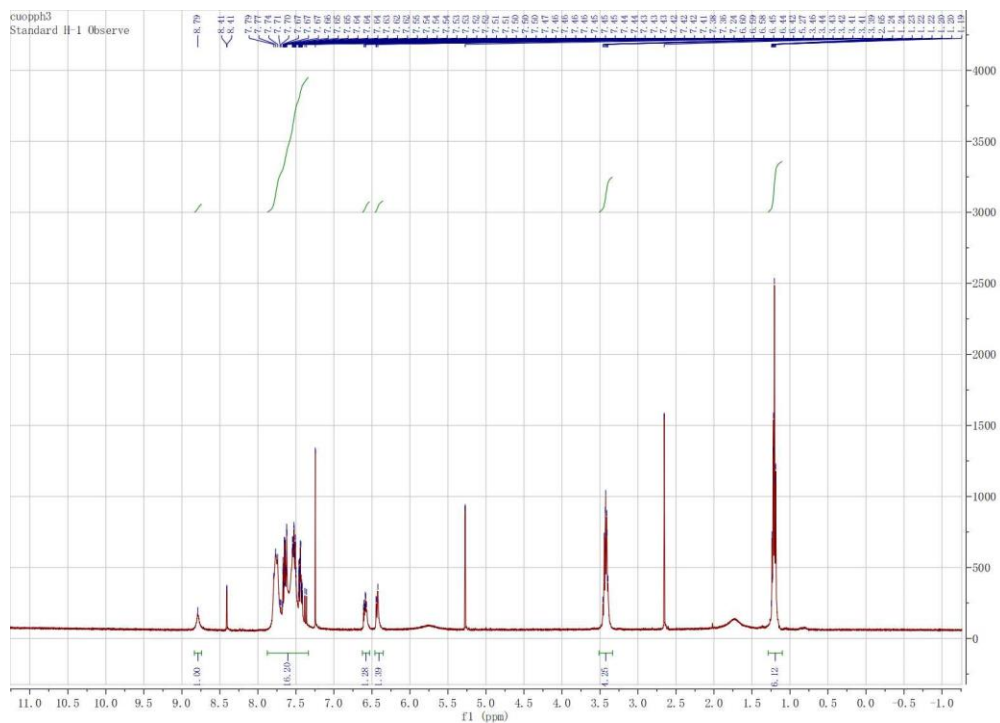

Figure S7.  $^1\text{H}$  NMR spectrum of compound **8** in  $\text{CDCl}_3$  solution.

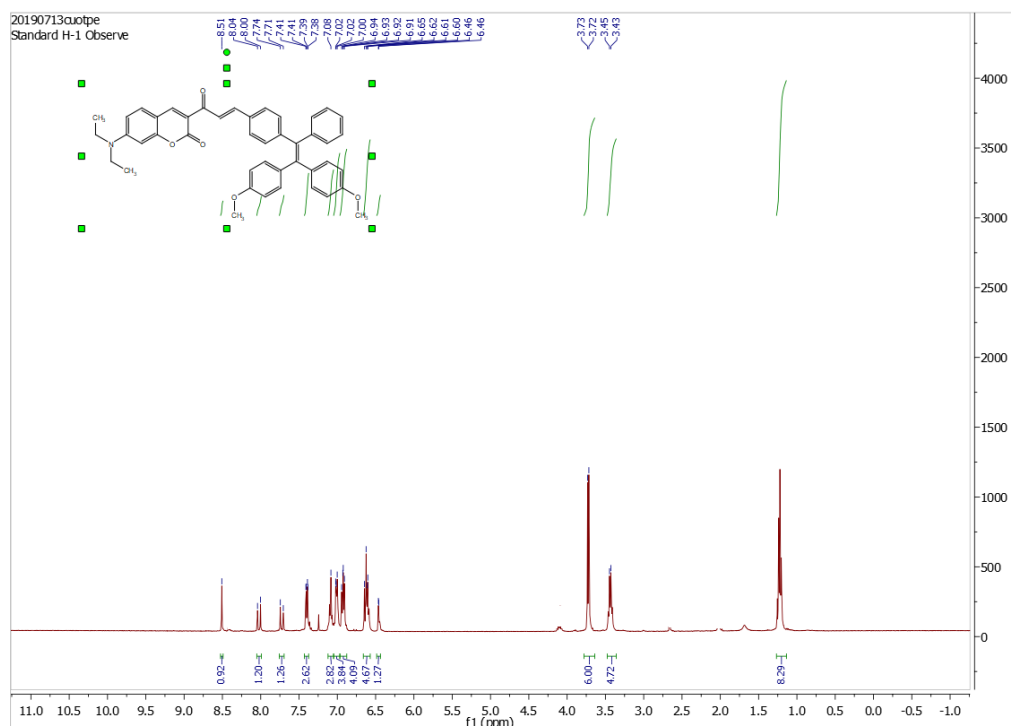

Figure S8.  $^1\text{H}$  NMR spectrum of probe **A** in  $\text{CDCl}_3$  solution.



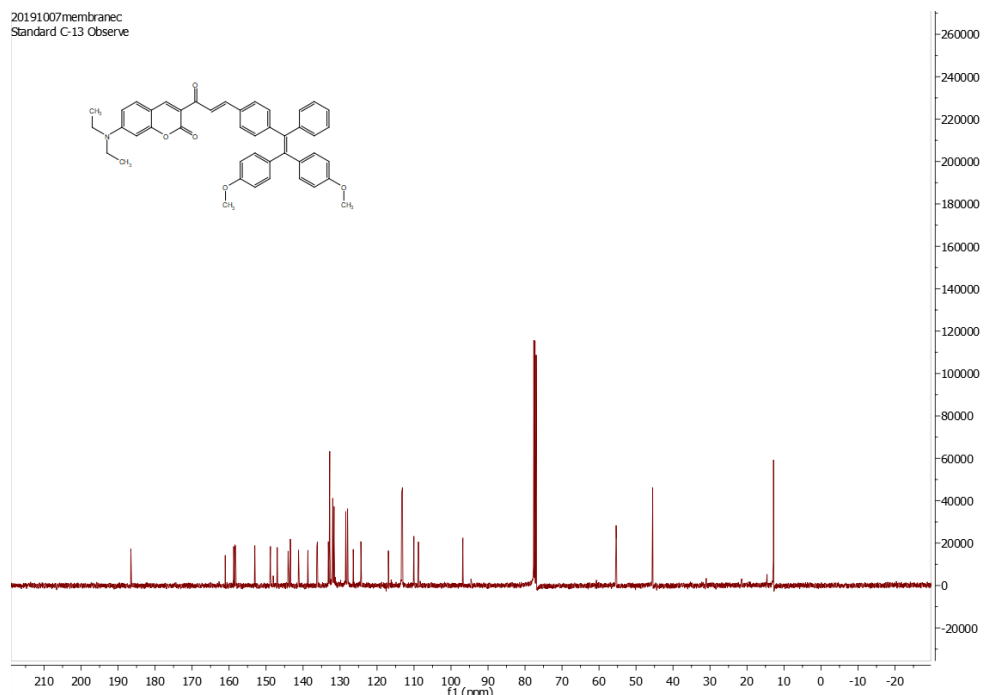

**Figure S9.**  $^{13}\text{C}$  NMR spectrum of probe **A** in  $\text{CDCl}_3$  solution.

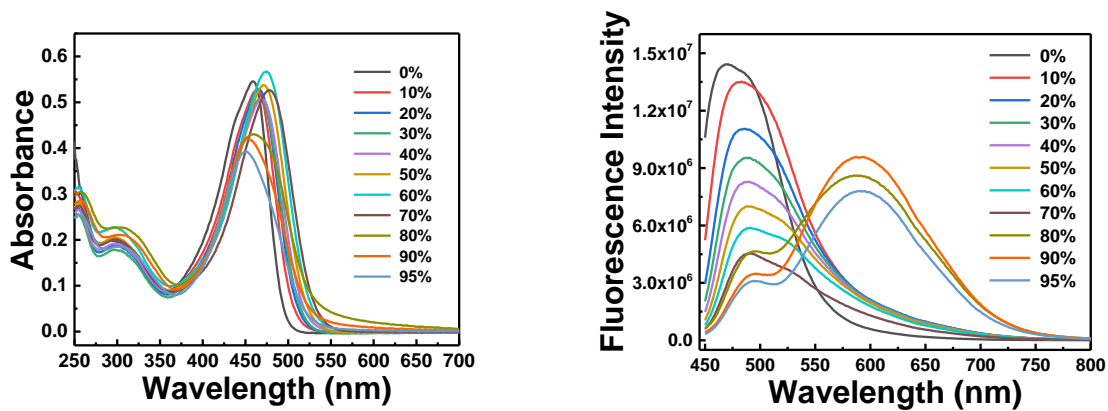

**Figure S10.** Absorption and fluorescence spectra of probe **A** in the mixture solutions of THF and water with various water percentages. Concentration of probe **A**:  $10 \mu\text{M}$ ; excitation wavelength: 430 nm.

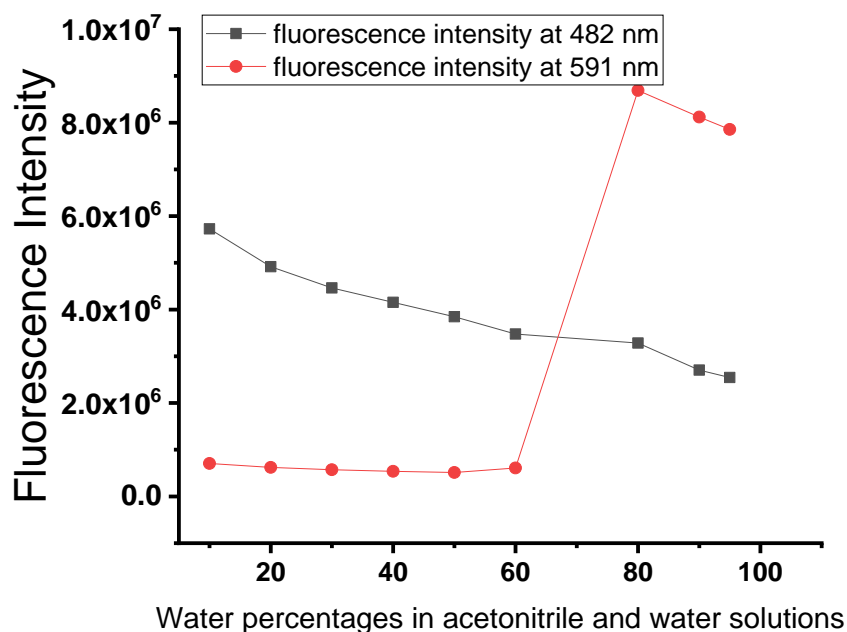

**Figure S11.** Fluorescence intensity of probe A (10 μM) in mixed water and acetonitrile solutions with various water percentages under excitation of 430 nm.

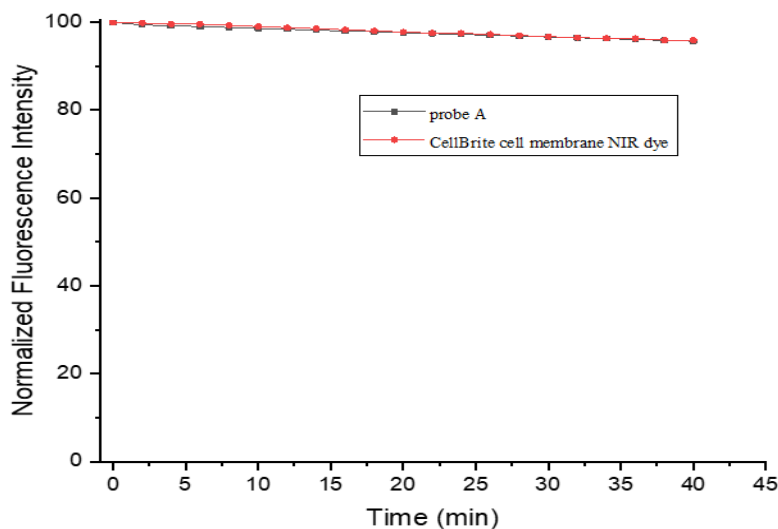

**Figure S12.** Fluorescence intensities at 591 nm for 10 μM probe A in mixed THF and water solution with 95% water under excitation at 488 nm versus time. Fluorescence intensities at 720 nm for 10 μM CellBrite cell membrane NIR dye in the same solvent condition under excitation at 630 nm versus time. Jobin Yvon Fluoromax-4 spectrofluorometer equipped with 150 W CW Ozone-free xenon arc lamp was used for photostability study.

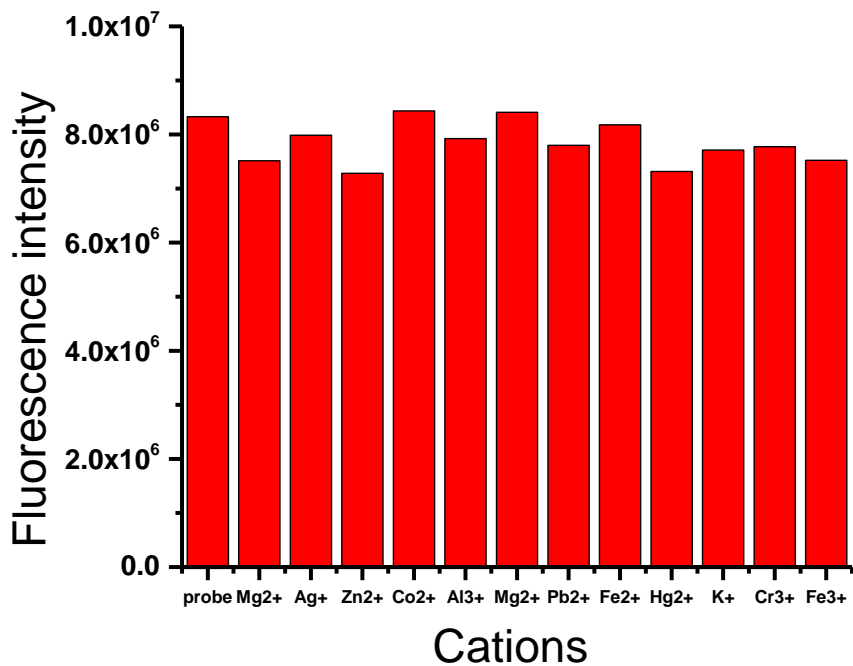

**Figure S13.** Fluorescence intensity of 5 μM probe A at 595 nm in the presence of 200 μM cations, such as Mg<sup>2+</sup>, Ag<sup>+</sup>, Zn<sup>2+</sup>, Co<sup>2+</sup>, Al<sup>3+</sup>, Mg<sup>2+</sup>, Pb<sup>2+</sup>, Fe<sup>2+</sup>, Hg<sup>2+</sup>, K<sup>+</sup>, Cr<sup>3+</sup> and Fe<sup>3+</sup> at 488 nm excitation.

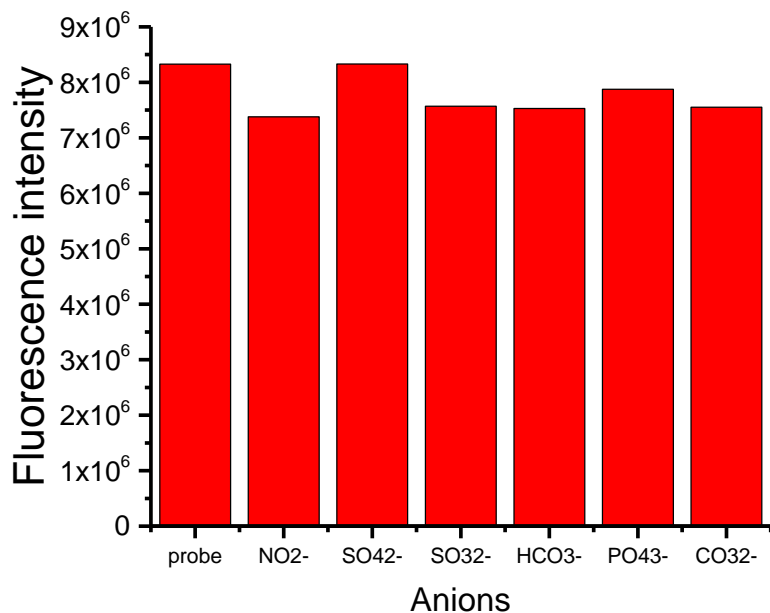

**Figure S14.** Fluorescence intensity of 5 μM probe A at 595 nm in the presence of 200 μM anions, such as NO<sub>3</sub><sup>-</sup>, SO<sub>4</sub><sup>2-</sup>, SO<sub>3</sub><sup>2-</sup>, HCO<sub>3</sub><sup>-</sup>, PO<sub>4</sub><sup>3-</sup>, and CO<sub>3</sub><sup>2-</sup> at 488 nm excitation.

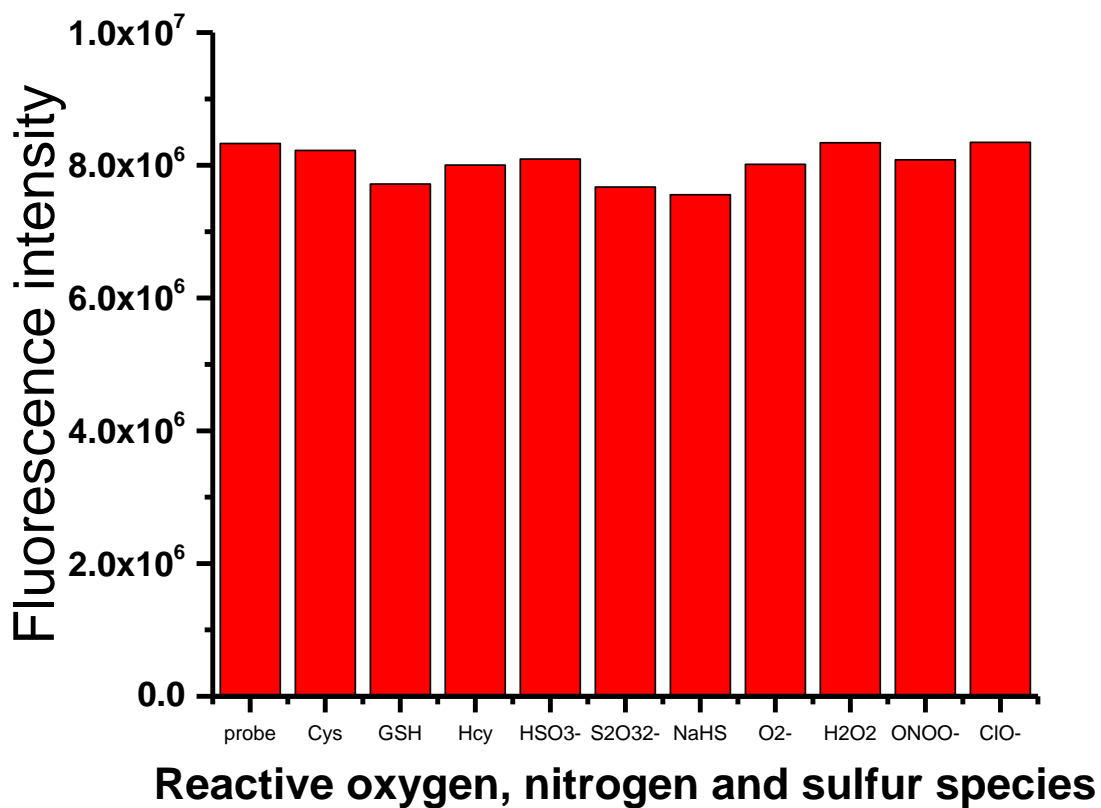

**Figure S15.** Fluorescence intensity of 5  $\mu\text{M}$  probe at 595 nm in the presence of 200  $\mu\text{M}$  reactive oxygen, nitrogen and sulfur species, such as cysteine (Cys), homocysteine (Hcy), glutathione (GSH),  $\text{HSO}_3^-$ ,  $\text{S}_2\text{O}_3^{2-}$ ,  $\text{H}_2\text{S}$ ,  $\text{O}_2^-$ ,  $\text{H}_2\text{O}_2$ ,  $\text{ONOO}^-$ , and  $\text{ClO}^-$  at 488 nm excitation.

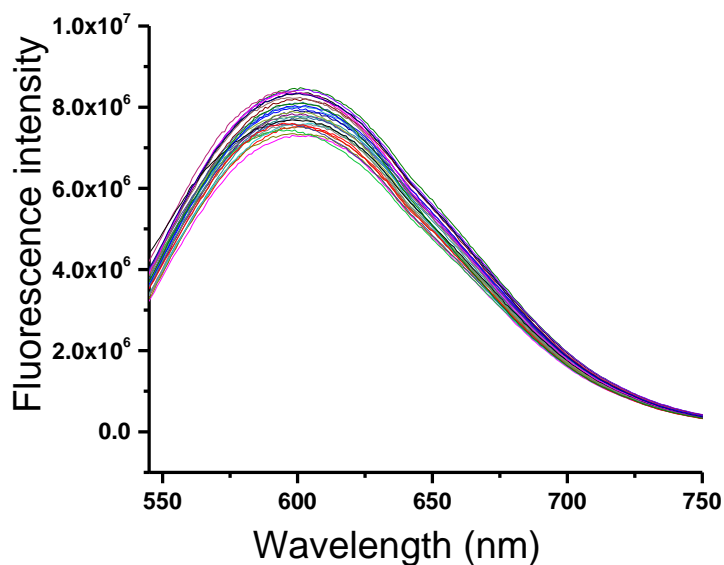

**Figure S16.** Fluorescence intensity of 5  $\mu\text{M}$  probe at 595 nm in the presence of 200  $\mu\text{M}$  anions, cations, biothiols and reactive oxygen, nitrogen and sulfur species, such as  $\text{Mg}^{2+}$ ,  $\text{Ag}^+$ ,  $\text{Zn}^{2+}$ ,  $\text{Co}^{2+}$ ,  $\text{Al}^{3+}$ ,  $\text{Mg}^{2+}$ ,  $\text{Pb}^{2+}$ ,  $\text{Fe}^{2+}$ ,  $\text{Hg}^{2+}$ ,  $\text{K}^+$ ,  $\text{Cr}^{3+}$ ,  $\text{Fe}^{3+}$ ,  $\text{NO}_3^-$ ,  $\text{SO}_4^{2-}$ ,  $\text{SO}_3^{2-}$ ,  $\text{HCO}_3^-$ ,  $\text{PO}_4^{3-}$ ,  $\text{CO}_3^{2-}$ , Cys, GSH, Hcy,  $\text{HSO}_3^-$ ,  $\text{S}_2\text{O}_3^{2-}$ ,  $\text{H}_2\text{S}$ ,  $\text{O}_2^-$ ,  $\text{H}_2\text{O}_2$ ,  $\text{ONOO}^-$ , and  $\text{ClO}^-$  at 488 nm excitation.

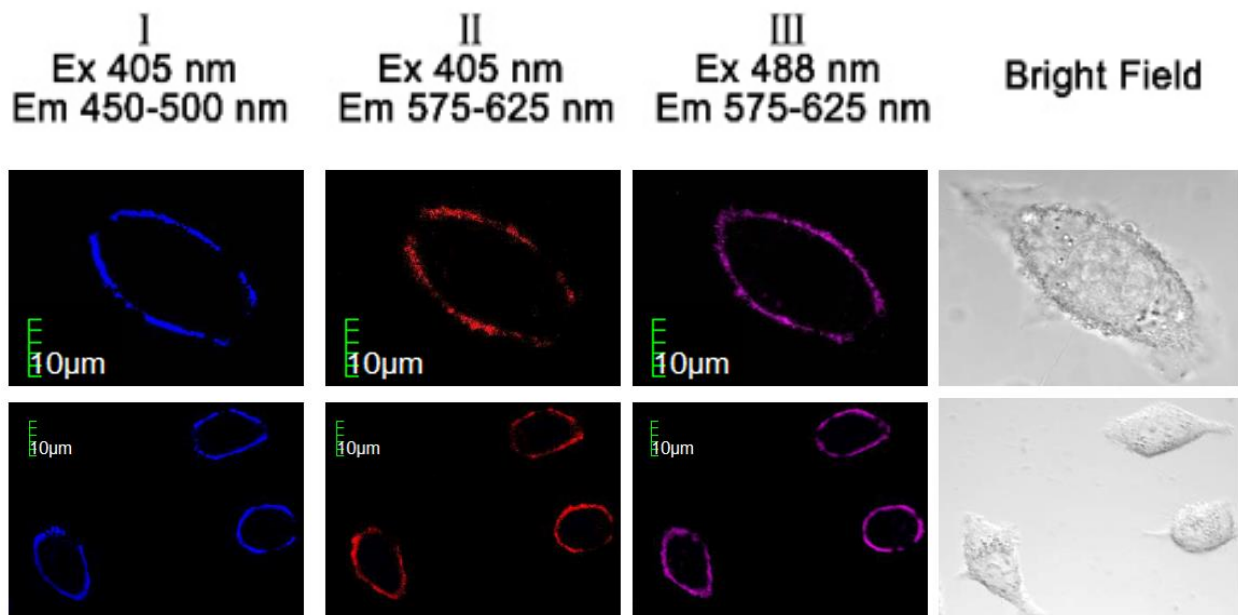

**Figure S17.** Fluorescence images of HeLa cells incubated with 10  $\mu\text{M}$  probe **A** for 15 minutes under excitation of 405 nm and 488 nm, respectively. Scale bars: 10  $\mu\text{M}$

## References

- (1) Collot, M.; Kreder, R.; Tatarets, A. L.; Patsenker, L. D.; Mely, Y.; Klymchenko, A. S. Bright fluorogenic squaraines with tuned cell entry for selective imaging of plasma membrane vs. endoplasmic reticulum. *Chem. Commun.* **2015**, 51 (96), 17136-17139, DOI: 10.1039/c5cc06094j.
- (2) Kucherak, O. A.; Oncul, S.; Darwich, Z.; Yushchenko, D. A.; Arntz, Y.; Didier, P.; Mely, Y.; Klymchenko, A. S. Switchable Nile Red-Based Probe for Cholesterol and Lipid Order at the Outer Leaflet of Biomembranes. *J. Am. Chem. Soc.* **2010**, 132 (13), 4907-4916, DOI: 10.1021/ja100351w.
- (3) Danylchuk, D. I.; Moon, S.; Xu, K.; Klymchenko, A. S. Switchable Solvatochromic Probes for Live-Cell Super-resolution Imaging of Plasma Membrane Organization. *Angew. Chem. Int. Ed.* **2019**, 58 (42), 14920-14924, DOI: 10.1002/anie.201907690.
- (4) Darwich, Z.; Klymchenko, A. S.; Dujardin, D.; Mely, Y. Imaging lipid order changes in endosome membranes of live cells by using a Nile Red-based membrane probe. *RSC Adv.* **2014**, 4 (17), 8481-8488, DOI: 10.1039/c3ra47181k.
- (5) Kreder, R.; Oncul, S.; Kucherak, O. A.; Pyrshev, K. A.; Real, E.; Mely, Y.; Klymchenko, A. S. Blue fluorogenic probes for cell plasma membranes fill the gap in multicolour imaging. *RSC Adv.* **2015**, 5 (29), 22899-22905, DOI: 10.1039/c4ra16225k.
- (6) Zhang, X. F.; Wang, C.; Jin, L. J.; Han, Z.; Xiao, Y. Photostable Bipolar Fluorescent Probe for Video Tracking Plasma Membranes Related Cellular Processes. *ACS Appl. Mater. Interf.* **2014**, 6 (15), 12372-12379, DOI: 10.1021/am503849c.
- (7) Collot, M.; Boutant, E.; Lehmann, M.; Klymchenko, A. S. BODIPY with Tuned Amphiphilicity as a Fluorogenic Plasma Membrane Probe. *Bioconjug. Chem.* **2019**, 30 (1), 192-199, DOI: 10.1021/acs.bioconjchem.8b00828.
- (8) Zhang, C. Q.; Jin, S. B.; Yang, K. N.; Xue, X. D.; Li, Z. P.; Jiang, Y. G.; Chen, W. Q.; Dai, L. R.; Zou, G. Z.; Liang, X. J. Cell Membrane Tracker Based on Restriction of Intramolecular Rotation. *ACS Appl. Mater. Interf.* **2014**, 6 (12), 8971-8975, DOI: 10.1021/am5025897.
- (9) Zhang, W. J.; Huang, Y. H.; Chen, Y. L.; Zhao, E. G.; Hong, Y. N.; Chen, S. J.; Lam, J. W. Y.; Chen, Y. C.; Hou, J. Q.; Tang, B. Z. Amphiphilic Tetraphenylethene-Based Pyridinium Salt for Selective Cell-Membrane Imaging and Room-Light-Induced Special Reactive Oxygen Species Generation. *ACS Appl. Mater. Interf.* **2019**, 11 (11), 10567-10577, DOI: 10.1021/acsami.9b00643.
- (10) Cielen, E.; Tahri, A.; Ver Heyen, K.; J. Hoornaert, G.; C. De Schryver, F.; Boens, N. Synthesis and spectroscopic characterisation of fluorescent indicators for Na<sup>+</sup> and K<sup>+</sup>. *J. Chem. Soc., Perkin Trans. 2* **1998**, (7), 1573-1580, DOI: 10.1039/A802183J.
- (11) Magde, D.; Rojas, G. E.; Seybold, P. G. Solvent dependence of the fluorescence lifetimes of xanthene dyes. *Photochem. Photobiol.* **1999**, 70 (5), 737-744, DOI: 10.1111/j.1751-1097.1999.tb08277.x.
- (12) Yu, H.; Xiao, Y.; Guo, H. From Spirolactam Mixtures to Regioisomerically Pure 5- and 6-Rhodamines: A Chemodosimeter-Inspired Strategy. *Org. Lett.* **2012**, 14 (8), 2014-2017, DOI: 10.1021/ol300523m.
- (13) Owens, E. A.; Bruschi, N.; Tawney, J. G.; Henary, M. A microwave-assisted and environmentally benign approach to the synthesis of near-infrared fluorescent pentamethine cyanine dyes. *Dyes Pigm.* **2015**, 113, 27-37, DOI: <https://doi.org/10.1016/j.dyepig.2014.07.035>.
